# Supplementary material for: Ultrastretchable, self-healable and adhesive composite organohydrogels with a fast response for human–machine interface applications
Source: Royal Society of Chemistry journal article supplement (doi:10.1039/d2tc00932c), 2022-01-01
Supplement: d2tc00932c4.pdf [file d2tc00932c4.pdf]

## Supporting Information

### Ultrastretchable, Self-healable and Adhesive Composite Organohydrogels with Fast Response for Human-Machine Interface Application

Zhihui Xie<sup>a</sup>, Zhuo Chen<sup>a</sup>, Xiangshu Hu<sup>a</sup>, Hao-Yang Mi<sup>a,b</sup>, Jian Zou<sup>a</sup>, Heng Li<sup>c</sup>,

Yuejun Liu<sup>a</sup>, Zhi Zhang<sup>d</sup>, Yinghui Shang<sup>d</sup>, Xin Jing<sup>a\*</sup>

<sup>a</sup>Key Laboratory of Advanced Packaging Materials and Technology of Hunan  
Province, Hunan University of Technology, Zhuzhou, 412007, China.

<sup>b</sup>Key Laboratory of Materials Processing and Mold, Zhengzhou University,  
Zhengzhou, 450000, China

<sup>c</sup>Department of Building and Real Estate, Hong Kong Polytechnic University, Hong  
Kong, 518000, China.

<sup>d</sup>Shenzhen Weijian Wuyou Technology, Shenzhen, Guangdong, China, 518102

#### Corresponding Authors:

Xin Jing

E-mail: jingxin@hut.edu.cn

**Table S1** Preparation of different hydrogels.

| Sample | Soaking solution |                                           | Soaking time<br>(h) |
|--------|------------------|-------------------------------------------|---------------------|
|        | LiCl<br>(M)      | H <sub>2</sub> O/Ethylene glycol<br>(v/v) |                     |
| PCH    | -                | -                                         | -                   |
| PCOH-2 | 1                | 8:2                                       | 2                   |
| PCOH-5 | 1                | 5:5                                       | 2                   |
| PCOH-8 | 1                | 2:8                                       | 2                   |

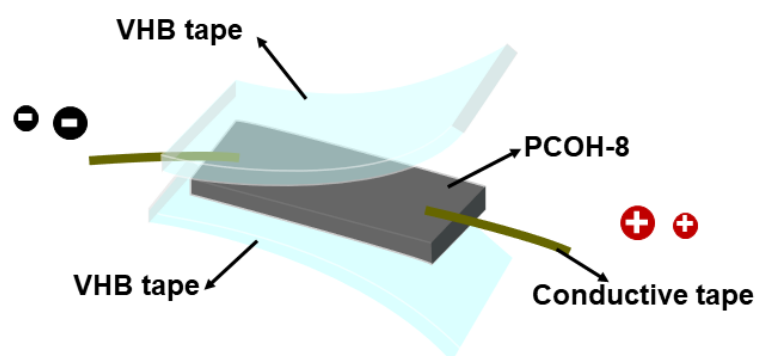

**Figure S1.** Schematic illustration of the sandwiched hydrogel strain sensor.

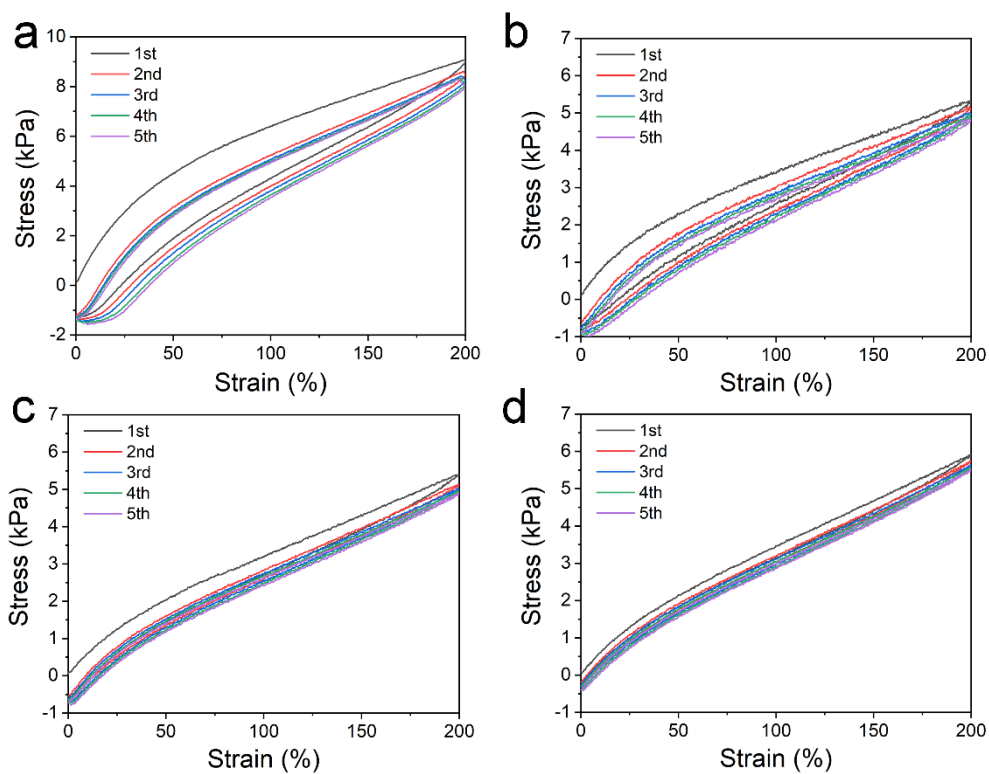

**Figure S2.** Strain-stress cyclic curves of (a) PCH; (b) PCOH-2; (c) PCOH-5; (d) PCOH-8.

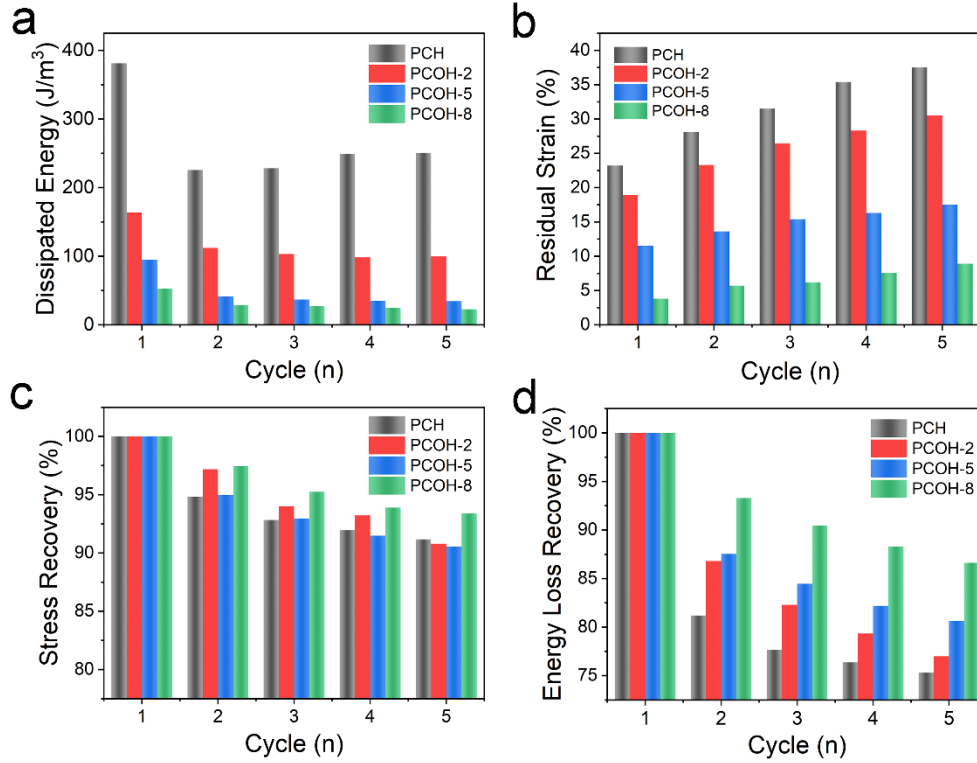

**Figure S3.** (a) The dissipated energy, and (b) The residual strain of successive cyclic tensile loading-unloading curves of PCH, PCOH-2, PCOH-5, and PCOH-8. (c) The stress recovery rates between the original and other cycles. (d) The energy loss recovery rates between the original and other cycles.

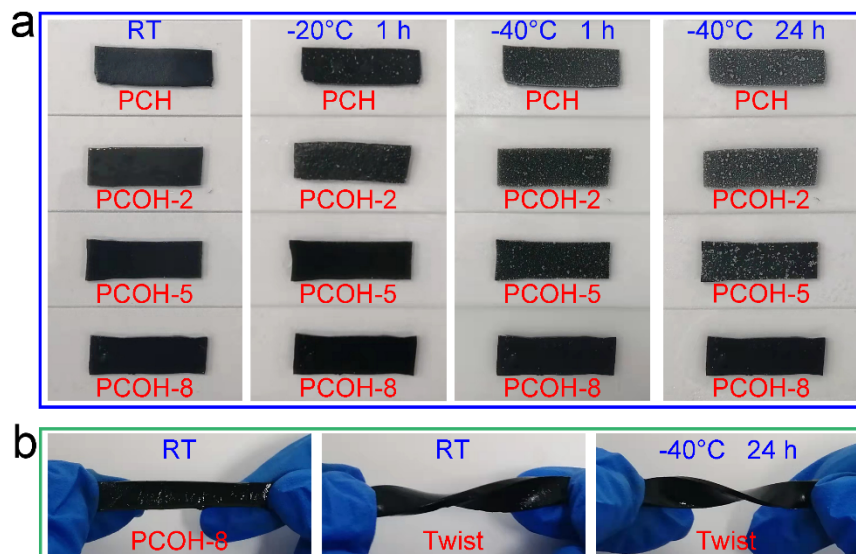

**Figure S4.** (a) Digital images of the hydrogel samples under different environments: room temperature, -20 °C for 1 h, -40 °C for 1h, and -40 °C for 24 h, respectively. (b) . Photographs of PCOH-8 upon being twisted at room temperature and at -40°C after storage for 24 h, respectively.

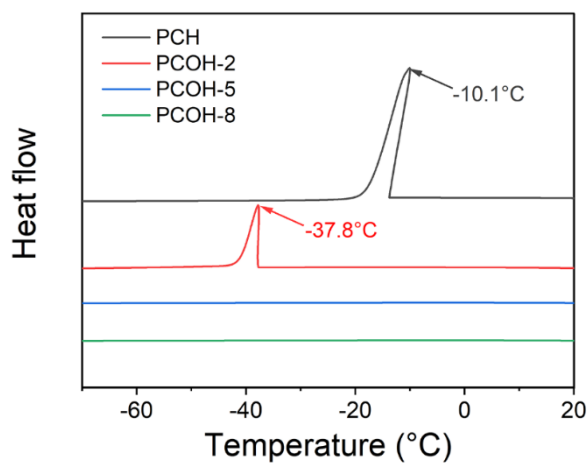

**Figure S5.** The DSC results of the PCH, PCOH-2, PCOH-5, and PCOH-8.

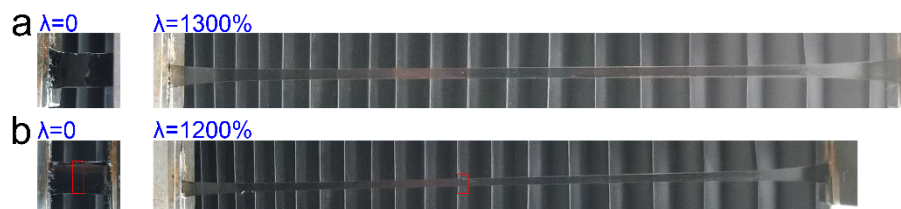

**Figure S6.** Photos of the PCOH-8 under stretching: (a) original PCOH-8 and (b) after self-healing for 2 h.

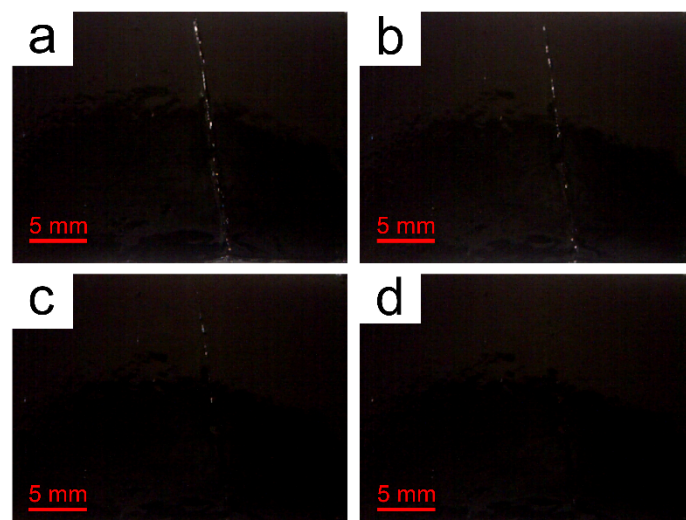

**Figure S7.** The self-healing behavior of the PCOH-8 upon different healing time. (a) 0 min, (b) 30 min, (c) 60 min and (d) 120min.

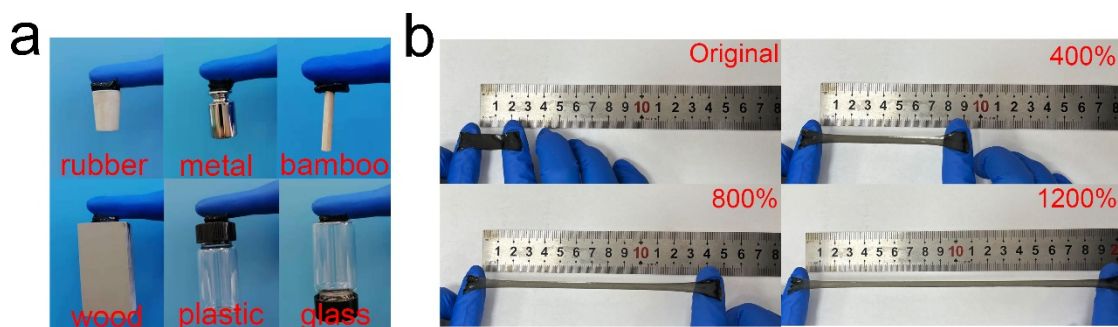

**Figure S8.** (a) Adhesion of the PCOH-8 to various substrates. (b) Optical images of the PCOH-8 adhered to nitrile gloves without the assistance of additional tape even under a stretch of 400%, 800%, and 1200%.

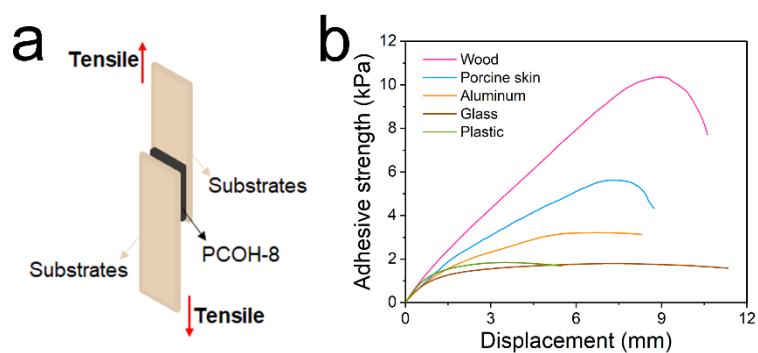

**Figure S9.** (a) Schematic of the adhesive tests on prepared PCOH-8. (b) Adhesive strength of PCOH-8 to diverse substrates (plastic, glass, aluminum, porcine skin and wood).



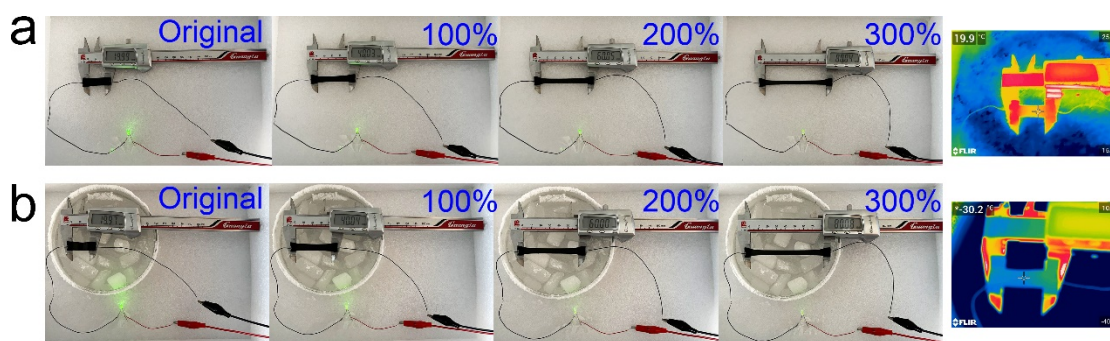

**Figure S10.** The conductive performance of PCOH-8 at different temperature:

(a) room temperature; (b)  $-72^{\circ}\text{C}$ .

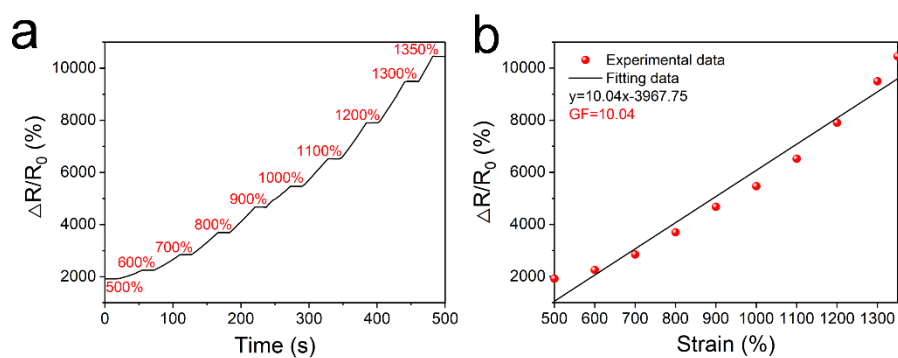

**Figure S11.** (a) Relative resistance change of the PCOH-8 being stretched for

different strains. (b) GF of the PCOH-8 at different strains.

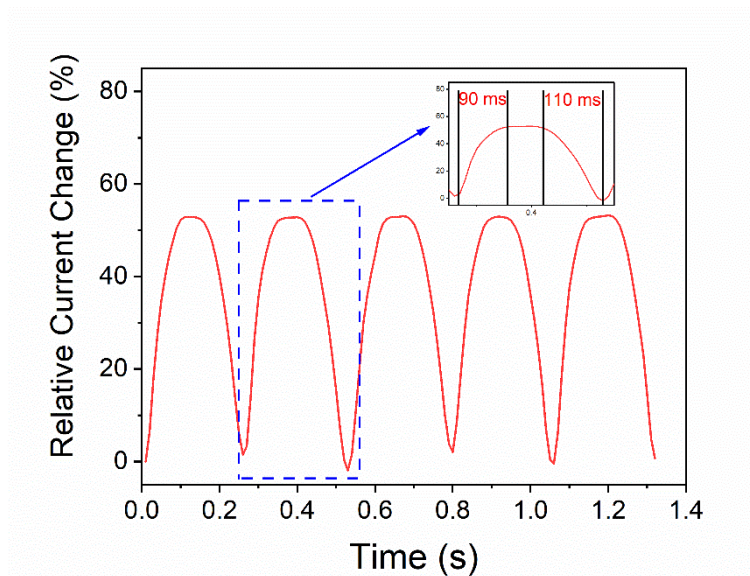

**Figure S12.** Response and release behavior of the strain sensor as the wrist bends.

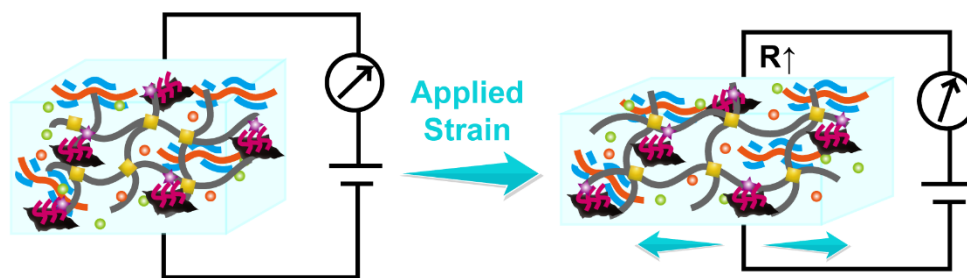

**Figure S13.** Scheme illustration of the strain sensing mechanism.

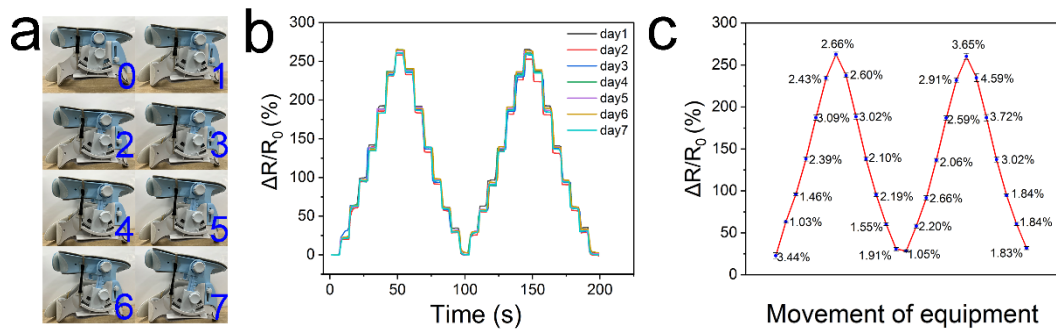

**Figure S14.** (a) The images of the PCOH-8 based strain sensor for detecting the up-down movement based on neck brace. (b) The long-term stability of the PCOH-8 based strain sensor for detecting the movement based on neck brace. (c) The error bar of each platform from b.

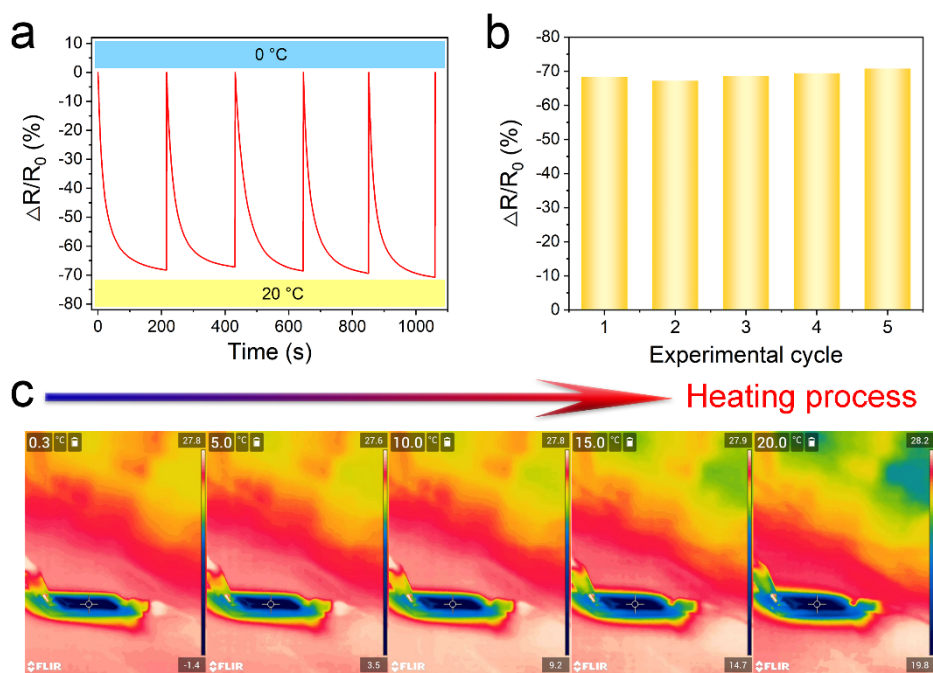

**Figure S15.** (a) Dynamic and quantitative responses of PCOH-8 from 0 to 25 °C for repeated five cycles. (b) The resistance changes corresponding to the repeated five cycles. (c) Infrared thermal images of PCOH-8 at 0 °C, 5 °C, 10 °C, 15 °C, and 20 °C, respectively.

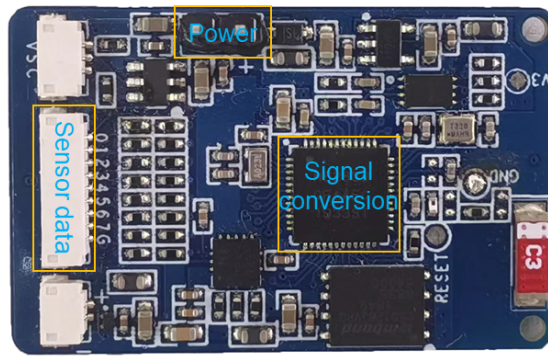

Wireless PCB

Figure S16. The module of signal processing-transmitting.

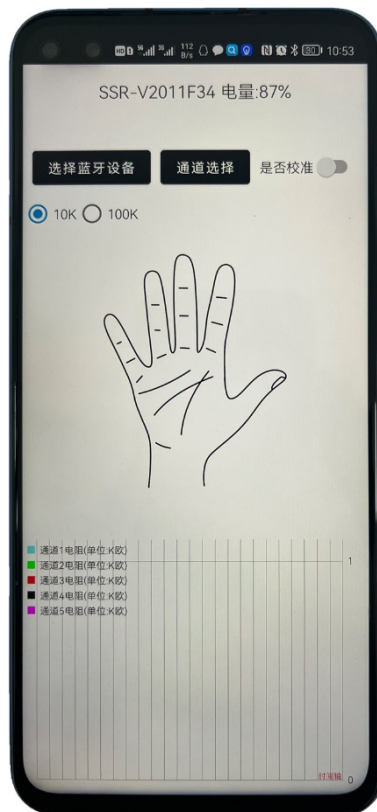

Figure S17. The interface of APP.

**Table S2.** Comparison in the properties of hydrogel based on different materials.

| Flexible sensor composition                 | Anti-freezing ability | Self-healing efficiency                                                            | Self-adhesion | Strain (%) | Ref.                                                              |
|---------------------------------------------|-----------------------|------------------------------------------------------------------------------------|---------------|------------|-------------------------------------------------------------------|
| PDA-rGO/<br>PEDOT:PSS/PAM<br>organohydrogel | -40 °C 24 h           | tensile strength<br>(92%);<br>elongation at<br>break (90%);<br>electrical<br>(90%) | YES           | 1350       | This work                                                         |
| PAM/gelatin/<br>PEDOT: PSS                  | -                     | -                                                                                  | NO            | 2850       | Nano Energy,<br>2020 <sup>1</sup>                                 |
| Alg-PBA/PVA<br>/PAM/rGO                     | -40 °C, 24 h          | elongation at<br>break (90%)                                                       | NO            | -          | ACS Appl.<br>Mater. Interfaces<br>2019 <sup>2</sup>               |
| CDB/PAM/PEDOT:<br>PSS                       | -                     | elongation at<br>break (92%)                                                       | YES           | 2763       | Chem. Eng. J.,<br>2021 <sup>3</sup>                               |
| PDA-rGO/ SA/PAM<br>organohydrogel           | -40 °C, 3 h           | -                                                                                  | NO            | 312        | J. Mater. Chem.<br>C, 2021 <sup>4</sup>                           |
| PEDOT:PSS-<br>P(AAM-co-MAA)                 | -                     | -                                                                                  | YES           | 129        | Colloids Surf. A<br>Physicochem.<br>Eng. Asp. , 2021 <sup>5</sup> |
| PVA-MXene-<br>PEDOT:PSS-PDA                 | -                     | tensile strength<br>(88.56%);<br>elongation at<br>break (95.47%)                   | YES           | 650        | J. Mater. Chem.<br>A, 2021 <sup>6</sup>                           |

**Table S3.** Comparison in the properties and applications of hydrogel-based strain sensors based on Table S2.

| Flexible sensor composition                 | Response time (ms) | Sensitivity                               | Human motion detection                                                                          | Ref.                                                                    |
|---------------------------------------------|--------------------|-------------------------------------------|-------------------------------------------------------------------------------------------------|-------------------------------------------------------------------------|
| PDA-rGO/<br>PEDOT:PSS/PAM<br>organohydrogel | 90                 | 0-500%,<br>3.91;<br>500%-<br>1350%, 10.04 | finger bending;<br>wrist bending;<br>knee bending;<br>cheek-bulging;<br>fowrn; opening<br>mouth | This work                                                               |
| PAM/gelatin/<br>PEDOT: PSS                  | 200                | 0-2850%,<br>1.58                          | cheek-bulging;<br>eyebrow up-down;<br>finger bending;<br>elbow bending;<br>knee bending;        | Nano Energy,<br>2020 <sup>1</sup>                                       |
| Alg-PBA/PVA<br>/PAM/rGO                     | 100                | -                                         | finger bending;<br>elbow bending;<br>swallowing;<br>speaking                                    | ACS Appl.<br>Mater.<br>Interfaces<br>2019 <sup>2</sup>                  |
| CDB/PAM/PEDOT:<br>PSS                       | -                  | -                                         | finger bending                                                                                  | Chem. Eng. J.,<br>2021 <sup>3</sup>                                     |
| PDA-rGO/ SA/PAM<br>organohydrogel           | 200                | 0-250%, 2.09                              | finger bending;<br>elbow bending;<br>cheek-bulging;<br>fowrn; a tiny<br>breathing               | J. Mater.<br>Chem. C,<br>2021 <sup>4</sup>                              |
| PEDOT:PSS-<br>P(AAM-co-MAA)                 | -                  | 0-70%, 0.003                              | -                                                                                               | Colloids Surf.<br>A<br>Physicochem.<br>Eng. Asp. ,<br>2021 <sup>5</sup> |
| PVA-MXene-<br>PEDOT:PSS-PDA                 | 630                | 0-500%,<br>2.55                           | finger bending;<br>wrist bending;<br>winking; smile                                             | J. Mater.<br>Chem. A,<br>2021 <sup>6</sup>                              |

**Table S4.** Summary of thermosensation capacities of hydrogel-based temperature sensors.

| Materials                                    | TCR (%/°C)                                                                                                      | Sensing range (°C) | Ref.                                          |
|----------------------------------------------|-----------------------------------------------------------------------------------------------------------------|--------------------|-----------------------------------------------|
| <b>PDA-rGO/ PEDOT:PSS/PAM organohydrogel</b> | <b>127.54 (-20~ -40 °C)</b><br><b>42.21 (-5~ -20 °C)</b><br><b>11.93 (15~ -5 °C)</b><br><b>1.64 (15~ 60 °C)</b> | <b>-40~60</b>      | <b>This work</b>                              |
| PANI NFs/PAA/Fe <sup>3+</sup>                | 1.64                                                                                                            | 40~110             | ACS Nano, 2020 <sup>7</sup>                   |
| PVA/DMSO/rGO/GO organohydrogels              | 3.81                                                                                                            | 20~85              | J. Mater. Chem.A, 2021 <sup>8</sup>           |
| PNIPAM/PEDOT:PSS/CNT                         | 2.6                                                                                                             | 25~40              | ACS Appl Mater Interfaces, 2018 <sup>9</sup>  |
| PVA/Gly/CB/CNT organohydrogel                | 0.935                                                                                                           | 30~80              | ACS Appl Mater Interfaces, 2020 <sup>10</sup> |
| PAA-NCT                                      | 252 (-35~ -30 °C)<br>28.7 (-30~ -5 °C)<br>1.78 (5~ 20 °C)<br>1.89 (20~ 50 °C)                                   | -35~50             | ACS Sustain. Chem. Eng., 2021 <sup>11</sup>   |
| P(AAm-AAc)                                   | 2.89                                                                                                            | 15~40              | Adv. Funct. Mater., 2021 <sup>12</sup>        |
| PVA/CNFs organohydrogels                     | 15 (0~ -30 °C)<br>45 (20~ 0 °C)<br>2.14 (20~ 34 °C)<br>0.944 (34~ 53 °C)<br>0.471 (53~ 70 °C)                   | -30~70             | J. Mater. Chem.A, 2020 <sup>13</sup>          |

The sensitivity in the above table is defined as  $\Delta G/G_0/\Delta T$  or  $\Delta R/R_0/\Delta T$ .



## References

1. H. Sun, Y. Zhao, C. Wang, K. Zhou, C. Yan, G. Zheng, J. Huang, K. Dai, C. Liu and C. Shen, *Nano Energy*, 2020, **76**, 105035.
2. D. Ma, X. Wu, Y. Wang, H. Liao, P. Wan and L. Zhang, *ACS Appl Mater Interfaces*, 2019, **11**, 41701-41709.
3. M. Suneetha, O. Sun Moo, S. Mo Choi, S. Zo, K. Madhusudana Rao and S. Soo Han, *Chemical Engineering Journal*, 2021, **426**, 130847.
4. Z. Xie, H. Li, H.-Y. Mi, P.-Y. Feng, Y. Liu and X. Jing, *Journal of Materials Chemistry C*, 2021, **9**, 10127-10137.
5. F. Sun, X. Huang, X. Wang, H. Liu, Y. Wu, F. Du and Y. Zhang, *Colloids and Surfaces A: Physicochemical and Engineering Aspects*, 2021, **625**, 126897.
6. W. Zhao, D. Zhang, Y. Yang, C. Du and B. Zhang, *Journal of Materials Chemistry A*, 2021, **9**, 22082-22094.
7. G. Ge, Y. Lu, X. Qu, W. Zhao, Y. Ren, W. Wang, Q. Wang, W. Huang and X. Dong, *ACS Nano*, 2020, **14**, 218-228.
8. H. Chen, J. Huang, J. Liu, J. Gu, J. Zhu, B. Huang, J. Bai, J. Guo, X. Yang and L. Guan, *Journal of Materials Chemistry A*, 2021, **9**, 23243-23255.
9. J. H. Oh, S. Y. Hong, H. Park, S. W. Jin, Y. R. Jeong, S. Y. Oh, J. Yun, H. Lee, J. W. Kim and J. S. Ha, *ACS Appl Mater Interfaces*, 2018, **10**, 7263-7270.
10. J. Gu, J. Huang, G. Chen, L. Hou, J. Zhang, X. Zhang, X. Yang, L. Guan, X. Jiang and H. Liu, *ACS Appl Mater Interfaces*, 2020, **12**, 40815-40827.

11. X. Jing, P. Feng, Z. Chen, Z. Xie, H. Li, X.-F. Peng, H.-Y. Mi and Y. Liu, *ACS Sustainable Chemistry & Engineering*, 2021, **9**, 9209-9220.
12. T. H. Park, S. Park, S. Yu, S. Park, J. Lee, S. Kim, Y. Jung and H. Yi, *Adv Healthc Mater*, 2021, **10**, e2100469.
13. X. Pan, Q. Wang, R. Guo, S. Cao, H. Wu, X. Ouyang, F. Huang, H. Gao, L. Huang, F. Zhang, L. Chen, Y. Ni and K. Liu, *Journal of Materials Chemistry A*, 2020, **8**, 17498-17506.
